# Supplementary material for: Nanoscale structural modulation and enhanced room-temperature multiferroic properties
Source: Royal Society of Chemistry journal article supplement (doi:10.1039/c4nr03542a), 2014-08-05
Supplement: c4nr03542a1.pdf [file c4nr03542a1.pdf]

## Supplementary Information

### Nonascale structural modulation and the enhanced room-temperature multiferroic properties

Shujie Sun,<sup>a</sup> Yan Huang,<sup>a</sup> Guopeng Wang,<sup>a</sup> Jianlin Wang,<sup>a</sup> Zhengping Fu,<sup>ac</sup> Ranran Peng,<sup>\*ac</sup> Randy J. Knize<sup>d</sup> and Yalin Lu,<sup>\*abcd</sup> □

<sup>a</sup> CAS Key Laboratory of Materials for Energy Conversion, Department of Materials Science and Engineering, University of Science and Technology of China, Hefei 230026, P. R. China

<sup>b</sup> Hefei National Laboratory for Physical Sciences at Microscale, University of Science and Technology of China, Hefei 230026, P. R. China

<sup>c</sup> Synergetic Innovation Center of Quantum Information & Quantum Physics, University of Science and Technology of China, Hefei, Anhui 230026, China

<sup>d</sup> Laser Optics Research Center, US Air Force Academy, Colorado 80840, USA

\* Corresponding Authors: pengrr@ustc.edu.cn, yllu@ustc.edu.cn,

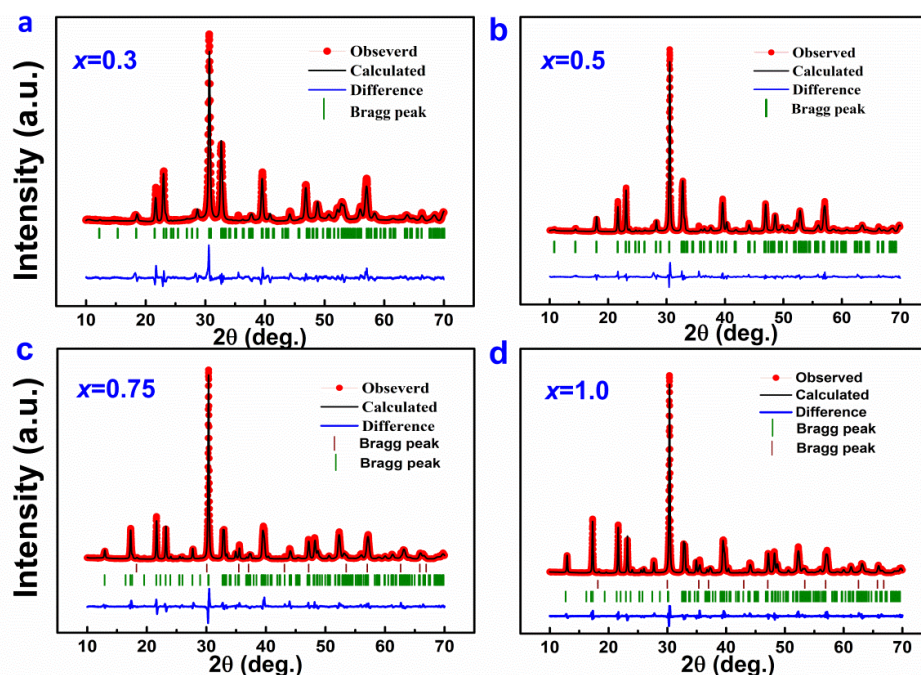

**Supplementary Fig. S1** Rietveld refinements for the powder XRD patterns of the sintered BFCT-*x* ceramics. (a) BFCT-0.3, (b) BFCT-0.5, (c) BFCT-0.75, and (d) BFCT-1.0. These XRD patterns were refined in the orthorhombic lattice using GSAS software. Circles indicate the experimental data and calculated data are the continuous black line overlapping them. The blue curve shows the difference between the experimental and calculated patterns. The vertical bars indicate the expected reflection positions. The lattice parameters and space groups turn out to be  $a=5.478$  Å,  $b=5.488$  Å,  $c=57.405$  Å and  $Fm2m$  for  $x=0.3$  ( $R_p=11.8\%$ ),  $a=5.458$  Å,  $b=5.460$  Å,  $c=49.257$  Å and  $F2mm$  for  $x=0.5$  ( $R_p=10.3\%$ ),  $a=5.462$  Å,  $b=5.434$  Å,  $c=41.115$  Å and  $A2_1am$  for  $x=0.75$  ( $R_p=12.6\%$ ) and  $a=5.465$  Å,  $b=5.433$  Å,  $c=41.113$  Å and  $A2_1am$  for  $x=1$  ( $R_p=8.8\%$ ), respectively. Minor  $CoFe_2O_4$  phase with space group  $Fd-3m$  and  $a=b=c=8.382$  Å is found in the samples of BFCT-0.75 and BFCT-1.0, in which the amount is below the XRD instrumental resolution.

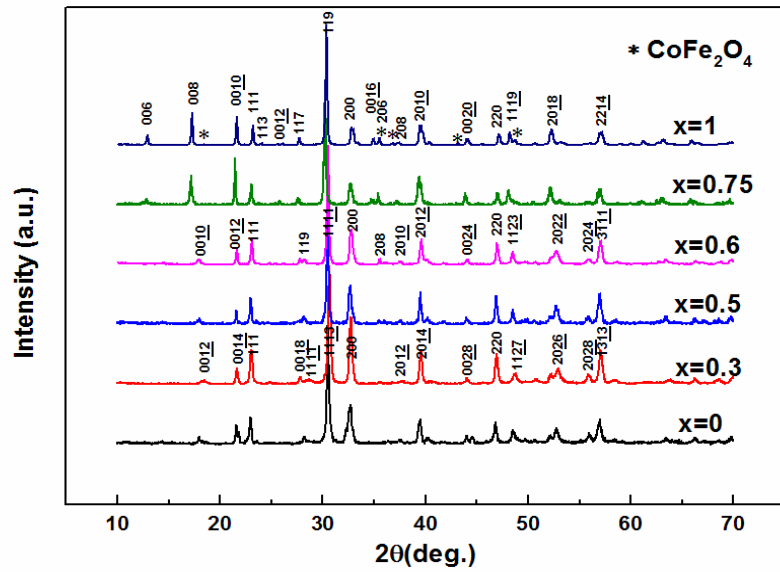

**Supplementary Fig. S2** X-ray diffraction patterns of the sintered BFCT- $x$  ( $x=0, 0.3, 0.5, 0.6, 0.75, 1.0$ ) at room temperature. The peaks of  $x=0$  and  $x=0.3$  are indexed in accordance with  $\text{Bi}_7\text{Fe}_3\text{Ti}_3\text{O}_{21}$  (JCPDS, No.54-1044), the peaks of  $x=0.5$  and  $x=0.6$  are confirmed from  $\text{Bi}_5\text{Fe}_2\text{Ti}_3\text{O}_{21}$  (the space group  $F2mm$ ), and the peaks of  $x=0.75$  and  $x=1.0$  are coincided with  $\text{Bi}_5\text{FeTi}_3\text{O}_{15}$  (JCPDS, No.82-0063). The samples are all mainly with the Aurivillius phase, though the samples of  $x=0.75$  and  $x=1.0$  show minor  $\text{CoFe}_2\text{O}_4$  impurity phase (marked by “\*”).

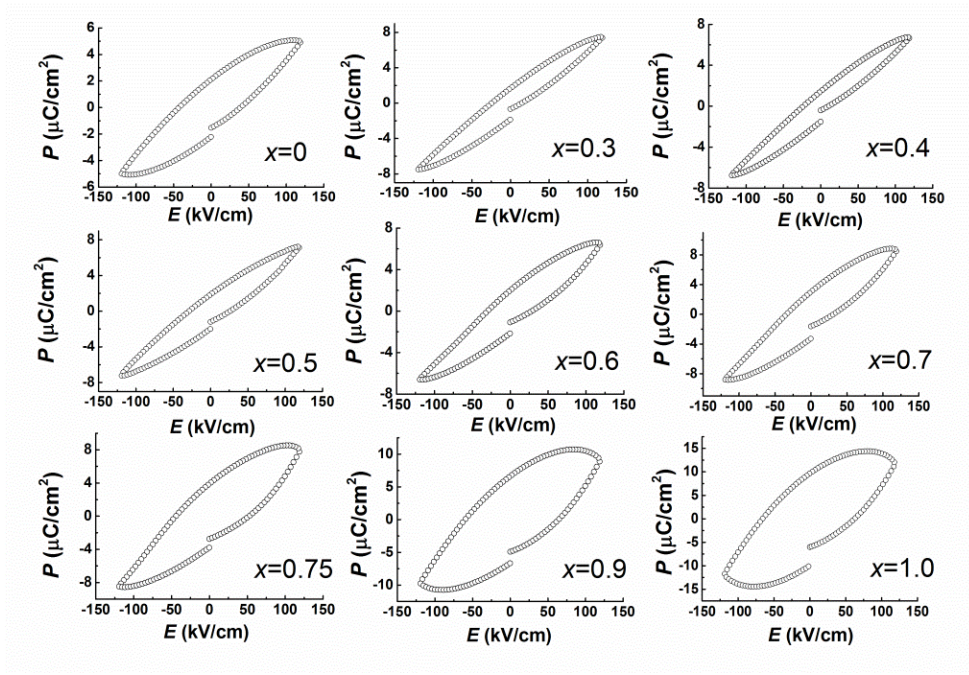

**Supplementary Fig. S3**  $P$ - $E$  loops of BFCT- $x$  ceramics at the room temperature.

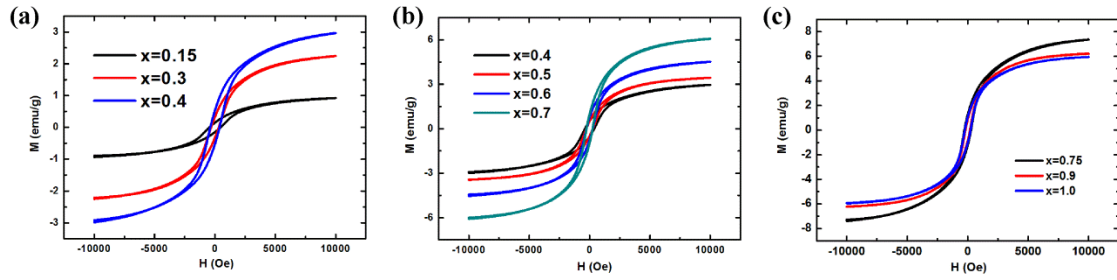

**Supplementary Fig. S4** Hysteresis loops of magnetization ( $M$ ) in the BFCT- $x$  ( $x \neq 0$ ) ceramics at the room temperature.

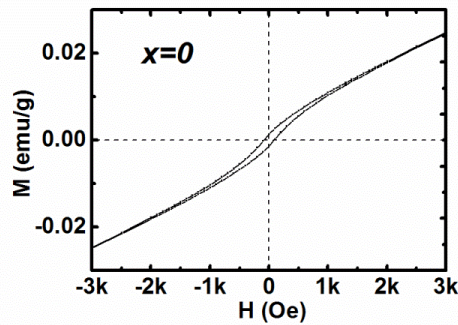

**Supplementary Fig. S5** Magnetic hysteresis loops of BFCT-0 ceramic at the room temperature.  $2M_r = 2.67$  memu/g.

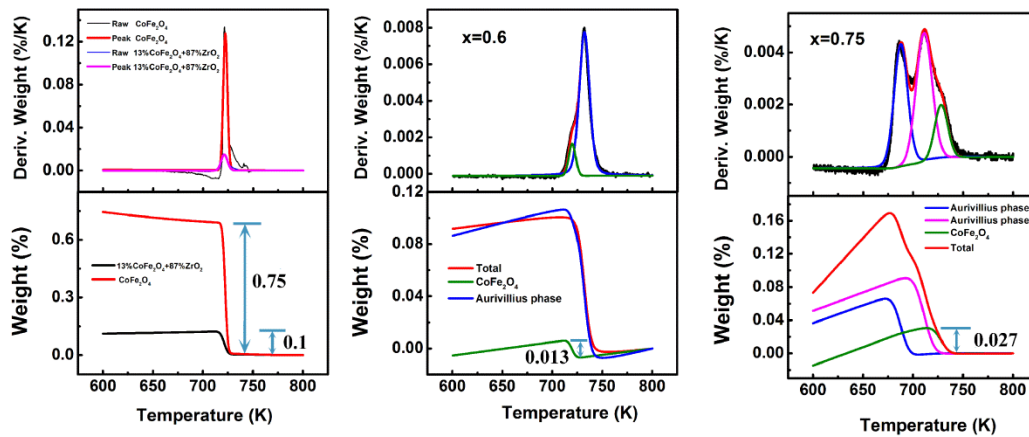

**Supplementary Fig. S6** Fitted DMTG curves and integral curves for  $\text{CoFe}_2\text{O}_4$ ,  $\text{ZrO}_2$ -13wt%  $\text{CoFe}_2\text{O}_4$  and BFCT- $x$  ( $x = 0.6$  and  $0.75$ ) at the temperature 600~800 K. The weight loss of  $\text{CoFe}_2\text{O}_4$  is 0.75%, and the weight loss of  $\text{ZrO}_2$ -13wt%  $\text{CoFe}_2\text{O}_4$  is about 0.1%. Intriguingly,  $0.1\% / 0.75\% = 13\%$ , is consisted with the weight percentage of  $\text{CoFe}_2\text{O}_4$  in the predesigned  $\text{ZrO}_2$ -13wt%  $\text{CoFe}_2\text{O}_4$ . In the terms of our analogy, the weight percentage content of  $\text{CoFe}_2\text{O}_4$  in BFCT-0.6 and BFCT-0.75 is  $\sim 1.7(\pm 0.5)\text{wt}\%$  ( $0.013\%/0.75\%$ ) and  $\sim 3.6(\pm 0.5)\text{wt}\%$  ( $0.027\%/0.75\%$ ), respectively. By this method, the content of  $\text{CoFe}_2\text{O}_4$  in other samples can be estimated ( $\sim 0.5\text{wt}\%$  in BFCT-0.4,  $\sim 1.0(\pm 0.5)\text{wt}\%$  in BFCT-0.5,  $\sim 2.6(\pm 0.5)\text{wt}\%$  in BFCT-0.7 and  $\sim 3.6(\pm 0.5)\text{wt}\%$  in BFCT-0.9~1.0).
